# Supplementary material for: Rehabilitation Professional and Patient Satisfaction with Telerehabilitation of Musculoskeletal Disorders: A Systematic Review
Source: Biomed Res Int. 2022 Aug 2;2022:7366063. doi: 10.1155/2022/7366063 (PMC9363217; doi:10.1155/2022/7366063)
Supplement: Supplementary Materials — [1] PRISMA 2020 checklist (supplementary file 1). [2] Search strategy (supplementary file 2). [file 7366063.f1.zip]

Archive with 2 entries (2 files):
- Supplementry 1 (PRISMAchecklist) .pdf
- Supplementry 2.docx
