# Supplementary material for: Rehabilitation Professional and Patient Satisfaction with Telerehabilitation of Musculoskeletal Disorders: A Systematic Review
Source: Biomed Res Int. 2022 Aug 2;2022:7366063. doi: 10.1155/2022/7366063 (PMC9363217; doi:10.1155/2022/7366063)
Supplement: Supplementary Materials — [1] PRISMA 2020 checklist (supplementary file 1). [2] Search strategy (supplementary file 2). [file 7366063.f1.zip › Supplementry 2.docx]

**Supplemental data**

**Search terms**

We used a variety of key search terms, as listed in the Medical Subject Headings combined with Boolean operators. Search terms were adapted for use in the different databases.Boolean expressions between keywords created a complex search string. Search strings for the research databases differed because of the differences in the indexing methods used by each database. Variations of this string were used**.** PubMed indexes the following under the heading of telemedicine: telerehabilitation, teleradiology, telepathology, and remote consultation.

The following search terms were applied:

The initial search in PubMed was (telemedicine OR telehealth OR telerehabiliataion) AND “Satisfaction AND (Musculoskeletal Disorders).

**Search:** (((((((((telerehabilitation) OR (Telehealth)) OR (telemedicine)) OR (telecunsultation)) OR (telephysiotherapy)) AND (Satisfaction)) OR (experience)) OR (expectations)) AND (Musculoskeletal disorders)) OR (Musculoskeletal Pain)

- telerehabilitation: "telerehabilitation"[MeSH Terms] OR "telerehabilitation"[All Fields]
- Telehealth: "telehealth's"[All Fields] OR "telemedicine"[MeSH Terms] OR "telemedicine"[All Fields] OR "telehealth"[All Fields]
- telemedicine: "telemedicine"[MeSH Terms] OR "telemedicine"[All Fields] OR "telemedicine's"[All Fields]
- Satisfaction: "personal satisfaction"[MeSH Terms] OR ("personal"[All Fields] AND "satisfaction"[All Fields]) OR "personal satisfaction"[All Fields] OR "satisfaction"[All Fields] OR "satisfactions"[All Fields] OR "satisfaction's"[All Fields]
- experience: "experience"[All Fields] OR "experience's"[All Fields] OR "experiences"[All Fields]
- expectations: "expect"[All Fields] OR "expectable"[All Fields] OR "expectance"[All Fields] OR "expectant"[All Fields] OR "expectative"[All Fields] OR "expected"[All Fields] OR "expecting"[All Fields] OR "expects"[All Fields] OR "motivation"[MeSH Terms] OR "motivation"[All Fields] OR "expectancies"[All Fields] OR "expectancy"[All Fields] OR "expectation"[All Fields] OR "expectations"[All Fields]
- Musculoskeletal disorders: "musculoskeletal diseases"[MeSH Terms] OR ("musculoskeletal"[All Fields] AND "diseases"[All Fields]) OR "musculoskeletal diseases"[All Fields] OR ("musculoskeletal"[All Fields] AND "disorders"[All Fields]) OR "musculoskeletal disorders"[All Fields]
- Musculoskeletal Pain: "musculoskeletal pain"[MeSH Terms] OR ("musculoskeletal"[All Fields] AND "pain"[All Fields]) OR "musculoskeletal pain"[All Fields]
